# Supplementary material
Source: Springer Nature journal article supplement (https://www.springermedizin.de/resource/supplementary/12936_2005_137_MOESM4_ESM.pdf/9546954)

**A**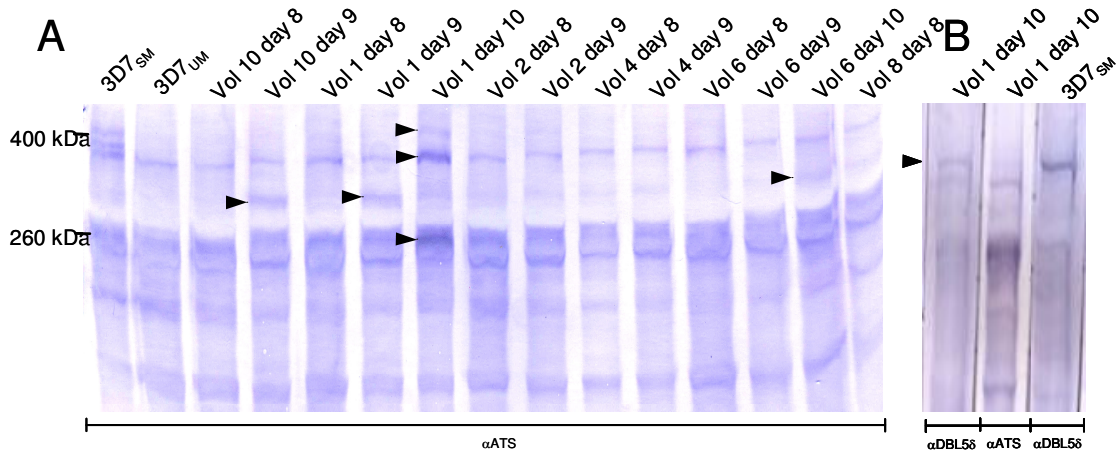**B**

Supplement: MOESM4 [file 9546954]
